# Supplementary material for: Human colon cancer profiles show differential microRNA expression depending on mismatch repair status and are characteristic of undifferentiated proliferative states
Source: BMC Cancer. 2009 Nov 18;9:401. doi: 10.1186/1471-2407-9-401 (PMC2787532; doi:10.1186/1471-2407-9-401)
Supplement: Additional file 4 — SVM confusion matrices. Confusion matrices for A) normal vs tumor comparison using all miRNA B) dMMR vs pMMR tumor comparison. [file 1471-2407-9-401-S4.XLS]

## Sheet: Sheet1
Additional file 4
A SVM Cross Validation Simulation Normal vs Tumor All Data
	True Normal	True Tumor	Sum	Correct [%]
Predicted Normal	14100	0	14100	100
Predicted Tumor	0	39900	39900	100
Sum	14100	39900	-	-
Correct [%]	100	100	-	-
B SVM CROS Validation Simulation dMMR vs pMMR Tumor 43 Significant
	True dMMR	True pMMR	Sum	Correct [%]
Predicted dMMR	4890	749	5640	86.7
Predicted pMMR	1200	33200	34400	96.5
Sum	6090	33900	-	-
Correct [%]	80.3	97.8	-	-
Classifier:Support Vector Machine
Penalty: 10
Kernel: Linear
Selection Method: ANOVA
No. of Variables: A. 100 B. 43
Sampling: Monte Carlo Cross Validation
Test set Fraction: 50
Numner of repeats:1000
